# Supplementary material
Source: PubMed Central journal article supplement (PMC2414292)

## **Supplementary Figure Legends**

SUPPLEMENTARY FIGURE 1. Color images from Fig. 1B and an overlay are shown.

Bar = 2  $\mu\text{m}$ . High magnification images show that GFP-N-WASP puncta are in close apposition to SV2 and completely merged with PSD-95 clusters (right panels). Bar = 0.4  $\mu\text{m}$ .

SUPPLEMENTARY FIGURE 2. Color images from Fig. 3B and overlays are shown.

Bar = 2  $\mu\text{m}$ .

SUPPLEMENTARY FIGURE 3. Color images from Fig. 4B and overlays are shown.

Bar = 2  $\mu\text{m}$ .

SUPPLEMENTARY FIGURE 4. Color images from Fig. 5B and overlays are shown.

Bar = 2  $\mu\text{m}$ .

SUPPLEMENTARY FIGURE 5. Color images from Fig. 6C and overlays are shown.

Bar = 2  $\mu\text{m}$ .

Wegner et al., Supplemental Figure 1

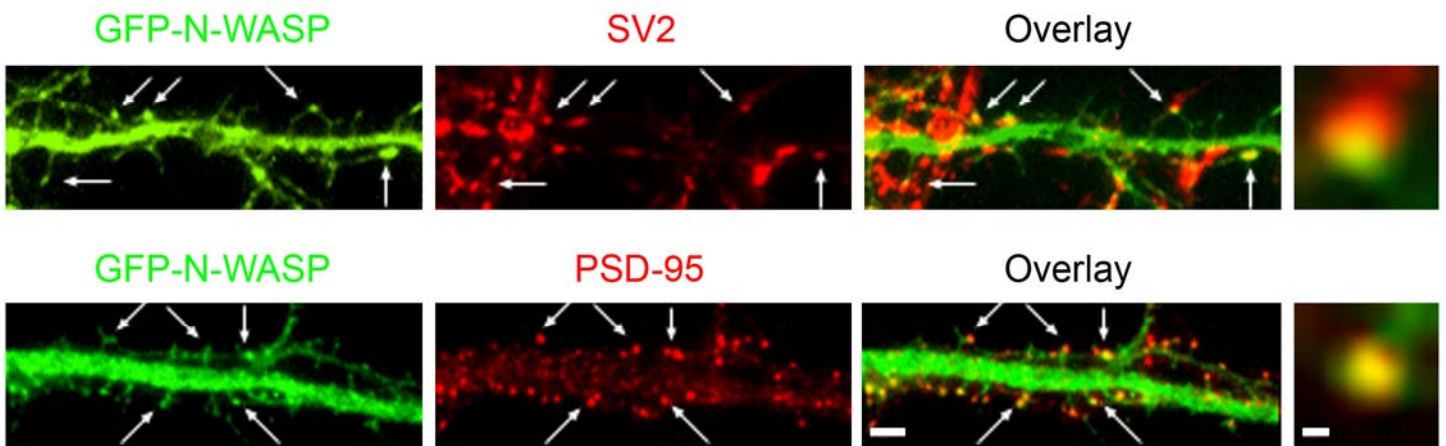

Wegner et al., Supplemental Figure 2

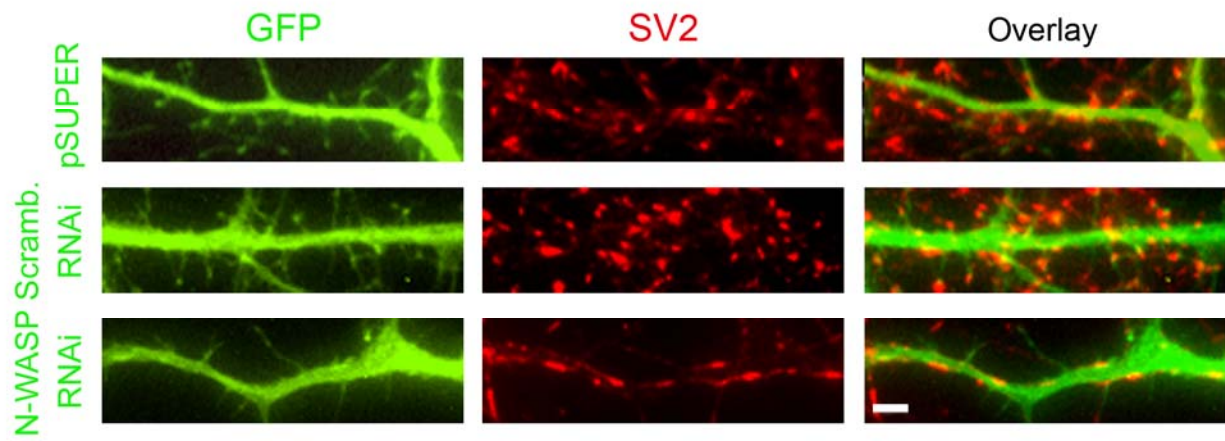

Wegner et al., Supplemental Figure 3

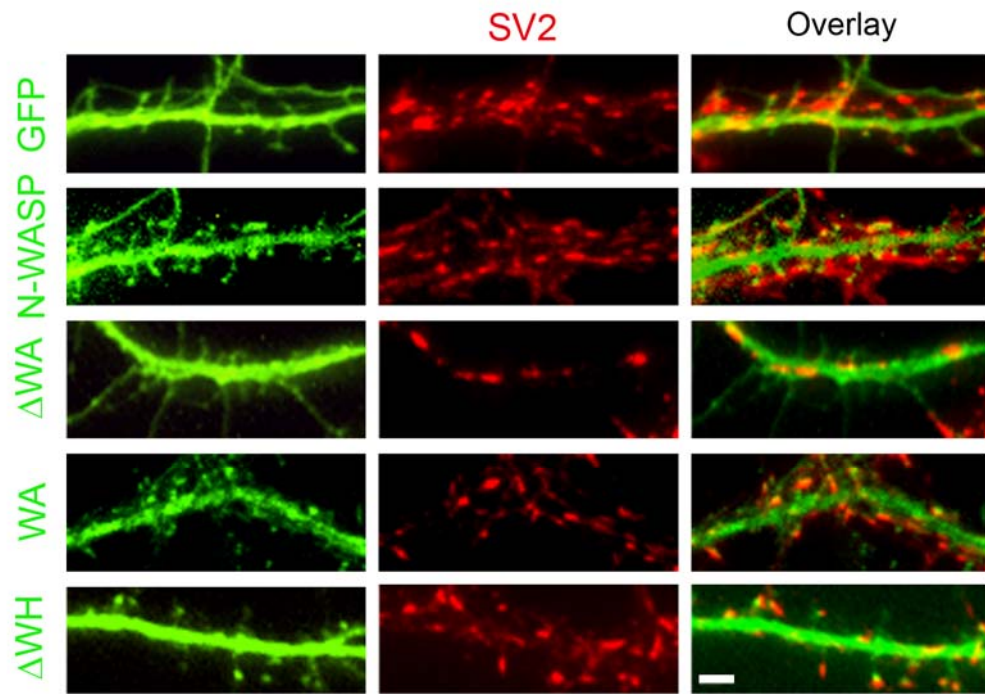

Wegner et al., Supplemental Figure 4

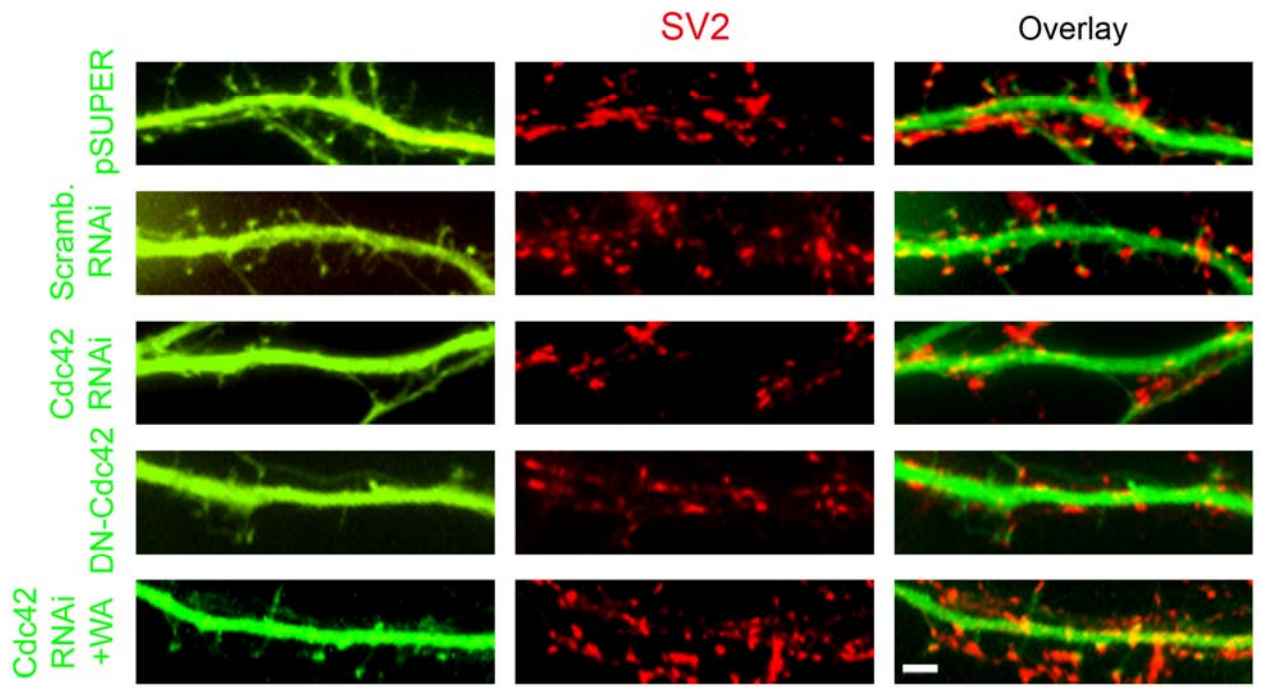

Wegner et al., Supplemental Figure 5

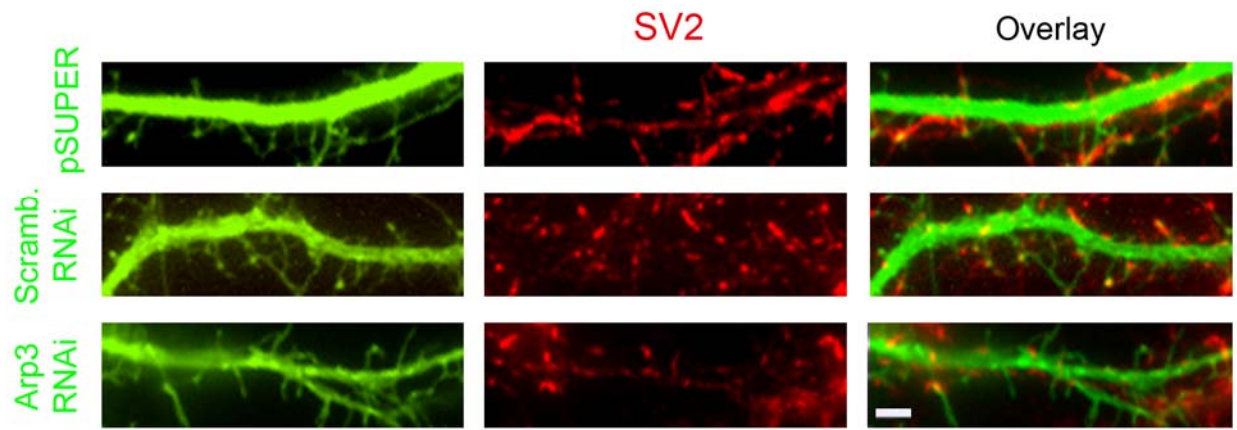

Supplement: supp_M801555200_Supplementary_Figures.pdf [file supp_M801555200_Supplementary_Figures.pdf]
